# Supplementary material
Source: PubMed Central journal article supplement (PMC2930698)
Supplement: supp_M110.121061_jbc.M110.121061-1.pdf [file supp_M110.121061_jbc.M110.121061-1.pdf]

# Supplementary Fig. 1

(A)

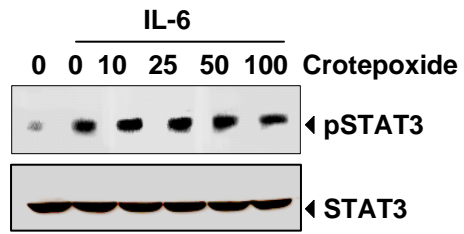

(B)

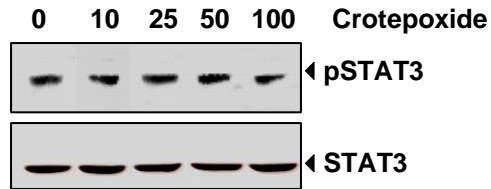

(C)

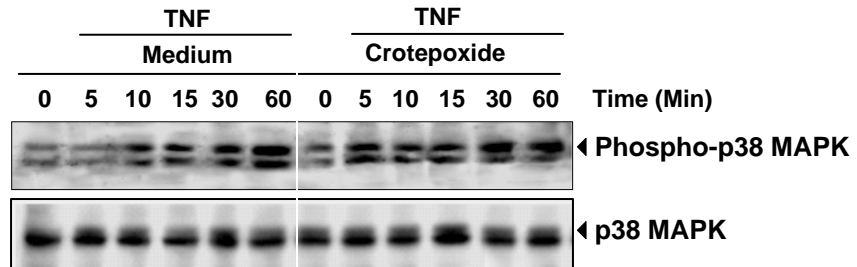

### **Legend of Supplementary Fig. 1**

*Crotopoxide does not modulate STAT3 and MAPK pathways.*

(A) Crotopoxidde did not suppress STAT3 activation. KBM-5 cells ( $2 \times 10^6$  cells/mL) was treated with crotopoxide with indicated concentration for 2 hours and then exposed with IL-6 for 15 min. Whole cell lysates were prepared and subjected to western blotting with antibody against pSTAT3. For loading control, the membrane was blotted with anti-STAT3 antibody.

(B) Crotopoxide did not inhibit constitutive STAT3 activation. U266 cells ( $2 \times 10^6$  cells/mL) were treated with crotopoxide with indicated concentration. After 2 h of incubation cells harvested, whole cell lysates were prepared and subjected to western blotting with antibody against pSTAT3. For loading control, the membrane was blotted with anti-STAT3 antibody.

(C) Crotopoxidde did not suppress MAPK activation. KBM-5 cells were pretreated with crotopoxide ( $50 \mu\text{M}$ ) for 2 hours and then treated with TNF ( $0.1 \text{ nM}$ ) for the indicated times. Whole cell extracts were prepared and analyzed by western blotting with antibodies against phospho-MAPK. For equal loading of protein, the membrane was blotted with anti-MAPK antibody.
